# Supplementary material for: Krill Oil Alleviated Methamphetamine-Induced Memory Impairment via the MAPK Signaling Pathway and Dopaminergic Synapse Pathway
Source: Front Pharmacol. 2021 Oct 29;12:756822. doi: 10.3389/fphar.2021.756822 (PMC8586701; doi:10.3389/fphar.2021.756822)
Supplement: Supplementary file 9 [file DataSheet5.XLSX]

## Sheet: DHA
Names	total	elements
DHA Possible target genes	116	ACE
		PRKCE
		KCNMA1
		ARRB2
		COX5A
		IGF1
		HMOX1
		NOS2
		SOD2
		NGF
		NLRP3
		OXT
		CYP1A2
		ATP1A2
		CYP2D6
		NOS1
		PRL
		SQSTM1
		MTHFR
		PLAT
		PIK3CG
		AKT2
		NQO1
		SOD1
		APOE
		NR4A1
		CREB1
		BDNF
		SRD5A1
		FOS
		HSPA5
		BCL2
		FGF2
		CGB5
		MAPK8
		GHRL
		ICAM1
		CAV1
		HPRT1
		PIK3R2
		ABL1
		MAPK3
		PENK
		CASP8
		MAPK10
		KRAS
		PPARG
		DBH
		PPIG
		MAPT
		CXCL8
		EGR1
		SRC
		ABCB1
		ALPP
		FAAH
		MTOR
		MAPK14
		VCAM1
		FABP3
		TP53
		FTH1
		YWHAH
		ADRB1
		TNF
		EGF
		CASP9
		CAT
		SLC1A2
		ABCC2
		GSTO1
		AKT1
		PIK3R1
		GRIN2B
		TNFRSF1A
		APAF1
		ITPR1
		CTNNB1
		NFKB1
		SIRT1
		IL1B
		NOX4
		CYP2E1
		P4HB
		POMC
		ESR1
		GPX4
		NFKBIA
		BECN1
		SNCA
		TJP1
		CYB5A
		ADRB2
		VEGFA
		GPX1
		GRIN2A
		JUN
		HCRT
		NRG1
		BRAF
		BAX
		GSK3B
		AKT3
		GPT
		SIGMAR1
		MMP1
		CYP3A4
		CAMK2G
		IL6
		ANXA5
		APP
		CPT2
		SLC2A1
		UCP2
		CASP3
		MMP9
DHA	672	VDR
		PPARD
		MLX
		HMGCR
		MMP2
		CHPT1
		BCL2L12
		STX3
		PTN
		CYP26A1
		XDH
		GSR
		ABCB7
		HSPB1
		CYP11A1
		FASLG
		TAX1BP1
		BID
		RXRG
		IRAK1
		AIFM1
		GGT1
		POLR2L
		PIK3R4
		TGFB2
		HSD17B2
		KDR
		RAC1
		NTRK1
		PLA2G2C
		PTEN
		SLC23A1
		GDF15
		PLA2G3
		CYCS
		HPD
		HMGCS2
		SLC27A6
		MMP7
		PRKCG
		INS
		FLT1
		PEBP4
		MMP13
		PLA2G2F
		ATP11B
		ACOT1
		PDIA2
		CCNB1
		ALOX12
		RARA
		BDH1
		MS4A1
		MYD88
		UCN
		PEX2
		YWHAG
		KCNE1
		SLC4A8
		MMP3
		BGLAP
		FGFR1
		SERPINA6
		MET
		TRAF6
		FABP7
		CASP6
		PPARA
		PNPLA3
		PLD2
		NR4A2
		LEFTY2
		GK
		SLCO1B3
		UGT1A1
		IL2RA
		CD59
		BIK
		OGN
		FFAR3
		SORL1
		NRP1
		NFIA
		ALOX5
		TTR
		FADS1
		LEP
		SERPINF1
		FBP2
		NAMPT
		FASN
		UGT1A9
		ELOVL5
		CRYAA
		MMP8
		PLA2G12B
		LHB
		BCL2L11
		SYCP2L
		BRCA1
		TGFB3
		FGF11
		BMP3
		RBP4
		SCGB1A1
		PRKCB
		NTRK2
		RXRA
		SLC23A2
		CYP2C19
		CRH
		IL10
		GRK6
		BTC
		PIK3R5
		TIMP3
		ACSBG2
		SLCO2B1
		SLC5A6
		NR1H3
		MAPK1
		MYRF
		PGF
		IGF2
		ATP9A
		PROK1
		TLR1
		SERPINA7
		SLC2A12
		CYP2U1
		UGT2B7
		RAC2
		SLC8A1
		LYPLA1
		CLC
		PLA2G1B
		RASGRP1
		FOXP3
		STIM2
		PLA2G5
		BIRC5
		LTBP4
		LPA
		TNFSF11
		FGF7
		GHR
		NPC1L1
		UTS2
		ATP8B2
		EGFR
		IKBKB
		LCT
		GDF6
		CYP3A7
		SLC10A6
		FFAR4
		FGF17
		CYP4F2
		PLTP
		PLA2G2A
		PCYT1A
		CD79A
		RNF146
		CASP10
		GATA6
		CTLA4
		ATP11A
		VAMP1
		ADORA1
		UCP1
		PLA2G2D
		GYPC
		IL2
		YWHAE
		FAS
		PRC1
		SDC1
		PON1
		FGA
		IGFBP1
		SLC1A1
		ADGRF1
		HBEGF
		PLD4
		CDK1
		CDKN1B
		PLA2G15
		SEMA3A
		GDF10
		CYP21A2
		IFNG
		SHBG
		ABCA1
		FABP5
		PDGFA
		PLSCR2
		CSF1
		PLIN2
		IL4
		YWHAQ
		DIABLO
		TSHZ3
		PLA2G4E
		SLC2A3
		FADS3
		SCP2
		MAP3K14
		TNFRSF11B
		ACOX1
		CD36
		STAT5B
		HSD3B2
		CXCL12
		TNXB
		SLC22A6
		ATP11C
		HSD17B4
		GPD1
		BDKRB2
		PLSCR1
		LIPG
		TF
		G6PD
		MDK
		GCK
		TLR6
		AGPAT3
		F7
		SULT1A3
		SLC27A4
		H4-16
		FEN1
		IGF1R
		ELOVL2
		NRG3
		ATP8A1
		LIPE
		F2R
		THBS1
		CYP1A1
		ACSL1
		BCL2L1
		RAB3IL1
		ARSH
		FGF18
		GMFG
		E2F1
		LTBP1
		FGF8
		TXNRD1
		GZMB
		PLD6
		PPBP
		BMP1
		OXTR
		APOB
		PLA2G4F
		CDC25C
		CFH
		NRIP1
		MC2R
		FGF6
		ACOT7
		NRP2
		ABCD1
		ACAA1
		CTSL
		INTS8
		FGF20
		ACADL
		FGFR3
		IL5
		PDP1
		CGA
		MYCN
		PEX16
		IGFL4
		NTF3
		GCKR
		ABCB4
		FGF1
		PLD1
		SGMS2
		TBXA2R
		GLG1
		ALOX15
		TNFRSF10B
		RHOA
		PLA2G7
		CRP
		TERT
		HIF1A
		DBN1
		PRKCD
		CALCA
		CEL
		OGFR
		TNFRSF11A
		TGFA
		PTH
		NOS3
		SEMA4G
		RUNX1
		PRKAA1
		FADS2
		ABCC11
		GDF5
		HBG2
		CYP4F3
		FGF5
		ANGPTL6
		CETP
		CFTR
		STAT5A
		HADHB
		ALPI
		ARMS2
		PNPLA6
		GAS2
		H3C15
		GLRX
		SAA1
		NRG4
		PDXDC1
		SMPD2
		KNG1
		ABCG5
		SELE
		CDK2
		PBX1
		ACP3
		PGR
		GPR84
		ATP10A
		CCNH
		FGF10
		FGF19
		TDGF1
		ODC1
		NFE2L2
		PIK3R3
		FGF16
		THBD
		NR5A1
		NR1I3
		YWHAZ
		CYP4V2
		IFI27
		LEFTY1
		PTGES2
		JADE1
		GDF9
		IL17A
		CYP17A1
		BCL2L15
		COG2
		GAS1
		GFER
		TLR4
		LTBP2
		CXCL10
		BMP6
		NPPA
		ACOT2
		PLSCR4
		PITPNA
		IQCJ
		SERPINE1
		CASP5
		ADAMTS3
		CYP19A1
		CYP2C8
		SLC22A8
		STS
		PLA2G6
		SLC1A3
		TPT1
		NPTX2
		SLC27A1
		CCL5
		CCN2
		SPRR2F
		PDGFRB
		IGHM
		SNAP25
		SMPD1
		UMPS
		GSTO2
		SAA4
		MFSD2A
		PLPP3
		DLG4
		GDF2
		PLA2G4D
		STOM
		FGF13
		NGFR
		ATP8B4
		BMP8A
		FLG
		IFNA1
		TGFBR3
		HLA-DPA1
		APOA5
		GNRH1
		PDGFD
		ALPG
		SPON1
		DAGLA
		HOGA1
		PLA2G4A
		PEMT
		CDKN1A
		LDLR
		GPR32
		LPL
		PARK7
		VEGFC
		PLCD3
		MPO
		PDGFB
		LIPC
		SELP
		NTF4
		JAK3
		LPCAT2
		NUDT6
		JAK1
		F5
		FGFR2
		PARP3
		GH2
		CSF3
		MAP1LC3B
		PCNA
		BEST1
		PITPNM3
		KIT
		HSD3B1
		ADAMTS4
		THPO
		SLC2A2
		TKFC
		ATP10D
		SCD
		TBRG1
		CFLAR
		NPTX1
		CHUK
		PDGFRA
		NR1H2
		TMEM258
		PDPK1
		PLD3
		STAT3
		CASP1
		CCL20
		SLC5A1
		FABP12
		PLA2G4C
		ABCG8
		GNPAT
		PRKACA
		MIP
		VEGFD
		ABCB11
		XIAP
		LGSN
		HADHA
		PEX26
		PTGS2
		LGALS4
		TALDO1
		BMP7
		PRKAB1
		DUSP1
		OLR1
		SEPHS1
		FGF4
		PCK1
		PLB1
		SULT2A1
		MLXIPL
		PCTP
		GH1
		MAP2K1
		FGF12
		TGFBR1
		TIMP2
		P2RY12
		RBP3
		CYP2C9
		AGPAT4
		CDC42
		GAS8
		VWF
		BAD
		LPCAT3
		IL18
		SEMA5A
		OXA1L
		CCND1
		ACOT4
		AGXT
		IGF2R
		ATP8A2
		ATP8B3
		FGF21
		LCAT
		PSIP1
		NRG2
		GRHPR
		BMP2
		IL9
		PRSS8
		SLCO1B1
		SLCO1A2
		KITLG
		HDGF
		GSK3A
		TOP2B
		BMP4
		CDK4
		TXN
		IGFBP3
		CLEC11A
		ALB
		CPT1A
		PTGS1
		SREBF1
		SERPINC1
		IDE
		F3
		PLSCR5
		GPX2
		S100A12
		MAT2B
		PRDX5
		CASP7
		ESRRB
		APOA1
		CEPT1
		PLA2G12A
		TIMP4
		ZNF536
		PLA2G2E
		KLF10
		ACSL5
		C1orf87
		SLC30A3
		LYPLA2
		TLR2
		FGFR4
		GPC6
		CTSD
		HPGD
		SREBF2
		PLA2G4B
		STAT6
		SGMS1
		ENPP2
		GALNS
		SCARB1
		PITPNM2
		CDKN2A
		IL3
		AREG
		TGFB1
		CASP4
		LRAT
		TFRC
		PPA1
		DPAGT1
		PTPA
		CASP2
		GAS6
		TM6SF2
		MYC
		PTH1R
		ADAMTS5
		NTRK3
		SULT2B1
		SOCS3
		KEAP1
		MTCH2
		SERPINF2
		CCNA2
		GAB1
		TIMP1
		SEMA4B
		S100A8
		NXPH1
		PTDSS2
		AR
		KCNN4
		FGF22
		SLC10A2
		PGD
		CHKA
		CDKN3
		FLT4
		BMP5
		SLC4A4
		CYP2J2
		MAP3K1
		SOAT1
		ADAMTSL1
		LACTB
		FFAR1
		HSPG2
		LPCAT1
		EPO
		DPP10
		IL2RB
		PCYT1B
		APRT
		PAX5
		PEBP1
		FDPS
		CP
		LY96
		PLA2G10
		KLK3
		FOXO1
		LTBP3
		ATP10B
		MCL1
		CCL2
		PRKCA
		SLC17A5
		ADCY10
		AHSP
		HGF
		MOGAT2
		TYMP
		ATP8B1
		PITPNB
		ACSL4
		FGF14
		ARFGAP1
		ELOVL4
		PDGFC
		ALPL
		BMP10
		INCENP
		VEGFB
		FGF23
		ADCY1
		BCL2A1
		RHO
		SMAP1
		LTA4H
		PLSCR3
		EFS
		FOXG1
		PITPNM1
		S100A9
		CSF2
		GHRH
		HSD17B13
		YWHAB
		PTDSS1
		SYP
		SOAT2
		GNRH2
		PARP1
		TOP1
		PLIN1
		MYB
		CD14
		RXRB
		ADIPOQ
Possible target genes	94	SLC6A2
		CXCR4
		PLAU
		GRM3
		PRKN
		SETD2
		SLC6A4
		SDHB
		CNR2
		GRM2
		HRH3
		MAOB
		GDNF
		GSTM1
		FMO3
		TAT
		MB
		PIK3CA
		MAOA
		GRIN2D
		DDIT3
		GRIN1
		CHRNA4
		SLC18A2
		GCLM
		DRD3
		OPRD1
		ADORA2A
		KCNH2
		ABAT
		RPS27A
		RYR1
		CYBB
		OPRK1
		ANKK1
		CHRNB2
		GUSB
		GRIN2C
		HSPA4
		DRD4
		PNOC
		MAP2
		GSTP1
		PSMC6
		CNR1
		CHRNA2
		PIK3C2A
		MP2
		OPRM1
		GFAP
		CD209
		GABBR1
		CYP2A6
		TH
		IL1A
		GRIN3B
		DLD
		DRD2
		GABRG2
		GABRB2
		GRP
		CHAT
		F2
		TPH1
		NPY
		GAD2
		TAC1
		GABRA2
		GRM1
		CCKBR
		MAP2K4
		CCK
		POR
		NTS
		GRIA3
		FMO1
		GABRA6
		GAD1
		GAL
		ACHE
		PDYN
		ITIH4
		GSTT1
		CES1
		PDE4A
		GABRA1
		GRIA2
		COMT
		KCNQ1
		SLC6A3
		CHRNA7
		SLC22A5
		GRIN3A
		DRD1

## Sheet: EPA
Names	total	elements
EPA Possible target genes	174	KCNMA1
		SLC6A2
		ARRB2
		CXCR4
		COX5A
		PLAU
		SETD2
		NOS2
		SLC6A4
		SOD2
		SDHB
		GRM2
		NGF
		NLRP3
		OXT
		CYP2D6
		NOS1
		MTHFR
		MAOA
		APOE
		BDNF
		GCLM
		BCL2
		DRD3
		CGB5
		ADORA2A
		KCNH2
		GHRL
		RPS27A
		RYR1
		CASP8
		MAPK10
		KRAS
		OPRK1
		PPARG
		CHRNB2
		GRIN2C
		DBH
		HSPA4
		PNOC
		PPIG
		MAPT
		GSTP1
		CXCL8
		EGR1
		PSMC6
		ABCB1
		CNR1
		ALPP
		CHRNA2
		PIK3C2A
		GABBR1
		CYP2A6
		MAPK14
		FTH1
		TH
		TNF
		EGF
		IL1A
		DRD2
		SLC1A2
		ABCC2
		GABRB2
		GRIN2B
		CHAT
		TNFRSF1A
		F2
		TPH1
		CTNNB1
		NPY
		GAD2
		CYP2E1
		TAC1
		ESR1
		GABRA2
		GRM1
		SNCA
		CCKBR
		MAP2K4
		CCK
		POR
		VEGFA
		GRIN2A
		NTS
		GRIA3
		FMO1
		GABRA6
		GAL
		ACHE
		GPT
		MMP1
		IL6
		CAMK2G
		ANXA5
		GABRA1
		CPT2
		KCNQ1
		UCP2
		CASP3
		SLC22A5
		GRIN3A
		ACE
		PRKCE
		HMOX1
		GRM3
		CNR2
		HRH3
		MAOB
		ATP1A2
		CYP1A2
		GDNF
		GSTM1
		FMO3
		PIK3CG
		PLAT
		TAT
		MB
		NQO1
		SOD1
		PIK3CA
		GRIN2D
		DDIT3
		GRIN1
		FOS
		CHRNA4
		SLC18A2
		FGF2
		OPRD1
		MAPK8
		ICAM1
		ABAT
		CAV1
		HPRT1
		MAPK3
		CYBB
		ANKK1
		GUSB
		DRD4
		MAP2
		SRC
		GFAP
		OPRM1
		CD209
		VCAM1
		TP53
		CASP9
		GRIN3B
		DLD
		CAT
		GABRG2
		AKT1
		GRP
		NFKB1
		SIRT1
		IL1B
		NFKBIA
		BECN1
		JUN
		HCRT
		GAD1
		BRAF
		PDYN
		ITIH4
		GSTT1
		CES1
		CYP3A4
		PDE4A
		GRIA2
		APP
		COMT
		SLC6A3
		CHRNA7
		MMP9
		DRD1
EPA	824	PTGER3
		MMP2
		RYR3
		GPHN
		XDH
		EDN1
		SLC4A1
		TKT
		HSPB1
		CYP11A1
		BID
		TRAF3IP2
		RAC1
		SUMO1
		NTRK1
		PTEN
		ANXA1
		CYCS
		CHRNA10
		HMGCS2
		LPO
		MMP13
		KCNA6
		DNAI1
		DDX5
		ACOT1
		DCK
		SLC22A4
		KCNE1
		GDA
		SLC4A8
		FABP7
		PTK2B
		GOT1
		SLCO1B3
		UGT1A1
		MUSK
		B3GAT1
		NFIA
		ALOX5
		TRIM22
		PLEK
		FADS1
		LEP
		SLC22A2
		CXADR
		GJA1
		FASN
		FAHD1
		ELOVL5
		TRPM8
		TTF2
		HSD11B2
		SLC12A4
		BRCA1
		GGT2
		RARS1
		PRKCB
		GRM8
		CYP2C19
		ACSL3
		TIMP3
		SLCO2B1
		NR1H3
		KRT1
		ABCG1
		VKORC1
		ENOX2
		ELANE
		CD160
		UGT2B7
		RAC2
		GLUD2
		SLC8A1
		GSS
		KCND1
		PTPN11
		KCNA1
		BIRC5
		CHRNA5
		GARS1
		SLC1A7
		CDK12
		ELOVL3
		SELL
		PLCG1
		GFPT2
		KCNC1
		CACNB3
		NEDD4
		LCT
		SKP1
		KCNA2
		IFNA2
		PLTP
		PLA2G2A
		FOLH1
		ALDH18A1
		ALK
		PF4
		FAS
		GLRA2
		SLCO2A1
		ORM1
		HSPD1
		F2RL1
		PNMT
		SOD3
		P2RX3
		FABP5
		ABCA1
		UGT2B10
		CSF1
		UGT1A10
		TUBB
		ALDH4A1
		UGT2B15
		PLIN2
		YWHAQ
		MYH6
		SCIN
		BCHE
		MUC1
		SCP2
		PTHLH
		TNFRSF11B
		ACOX1
		CD36
		TNXB
		SLC22A6
		DUSP2
		BDKRB2
		SLC12A6
		GABRR2
		PCK2
		TF
		NPR1
		F7
		AGPAT3
		EDNRA
		F9
		LIPE
		IRS1
		TUBA3C
		CYP1A1
		ARSH
		CD40
		TACR1
		SGCB
		GRIK2
		MT3
		DPYD
		PPBP
		LIF
		APOB
		CFH
		ACOT7
		CACNB1
		IL5
		CGA
		IGFL4
		CHRM1
		PLD1
		GALR1
		TBXA2R
		ALOX15
		CHGA
		CACNA1B
		RHOA
		CRP
		HSPA8
		CALCA
		GRIK4
		CEL
		SERPINA1
		RUNX1
		FADS2
		GABRQ
		SLC9A3
		HBG2
		CYP4F3
		GABRG1
		FXN
		STAT5A
		SLC12A2
		PNPLA6
		KCNJ13
		CHRNB4
		CD58
		NADSYN1
		PTGER1
		SCN11A
		SELE
		AHR
		PHOX2B
		DHFR
		TPMT
		KCNA4
		ATP1A1
		NFE2L2
		THBD
		NR1I3
		CYP4V2
		JADE1
		IL17A
		TMPO
		ASPH
		GALR2
		GOT2
		LEPR
		EARS2
		BMP6
		PPP1R1B
		SCN3A
		KCNB2
		NPPA
		MAP10
		ACOT2
		KDM1A
		SLC25A22
		BNIP3
		NCOA3
		CYP19A1
		SLC22A8
		SLC22A1
		SLC25A18
		DDX42
		HTR3B
		PLA2G6
		HRH2
		CYP3A5
		TRPV2
		SLC27A1
		CCN2
		GC
		SLC22A11
		GABRB1
		SLC4A5
		PHB2
		RAF1
		NGFR
		GRM6
		HLA-DPA1
		GNRH1
		CMA1
		SULT1A1
		KCND3
		PLA2G4A
		LDLR
		RIF1
		KLF2
		TUBA1A
		MPO
		ELN
		SELP
		NTF4
		VIM
		PCNA
		CSF3
		UGT1A8
		BEST1
		PRKAR1A
		KRT8
		ADAMTS4
		LDHA
		TACR2
		SCD
		MAP7
		EGLN1
		EIF2S1
		ASIC1
		JAK2
		CACUL1
		CHUK
		NR1H2
		TAC3
		STAT3
		CASP1
		CCL20
		SPP1
		ABCG8
		MCFD2
		GRIA1
		XIAP
		KCNC3
		CA9
		TRPA1
		LGSN
		PTGS2
		SDHD
		B2M
		SEPHS1
		FGF4
		ADAM10
		GABRE
		CYP2C9
		DNMT3A
		CDC42
		VWF
		NT5E
		BAD
		IL18
		CYP2A7
		OXA1L
		CCND1
		S100B
		CLEC4M
		BMP2
		MGP
		TRPC1
		GABRG3
		SLCO1B1
		SLCO1A2
		HSPA1A
		MAPK7
		AGTR1
		TFF2
		CMKLR1
		FLI1
		DGKQ
		CAMP
		RIMKLB
		GBA
		SIK2
		PPIB
		SFN
		CYP2A13
		UGT1A4
		ESD
		MAT2B
		SRGN
		PRDX5
		HRAS
		ZNF536
		UGT1A6
		ANG
		TAF4
		C1orf87
		MDH2
		PROS1
		CRAT
		HPGD
		SREBF2
		SLC4A7
		ENPP2
		SLC7A11
		SCARB1
		CACNA1F
		IL3
		TGFB1
		MME
		TFRC
		NAGS
		GAST
		GABRR3
		MYC
		AGXT2
		EPRS1
		ASIC3
		KEAP1
		GGT6
		SERPINF2
		CCNA2
		RNPC3
		FBN1
		TIMP1
		S100A8
		SPCS1
		SLC10A2
		CPQ
		MAP3K1
		SOAT1
		FFAR1
		IL13
		F8
		ATF4
		AADAT
		PDK4
		CCL2
		AMPD3
		ADCY10
		ADA
		NCOA6
		GCLC
		TLR3
		IGKV2D-29
		KCNA10
		PTBP1
		EPHX2
		ELOVL4
		GLRA3
		EEF1A1
		CCR7
		SLC22A3
		TRPV1
		HSP90AA1
		FOXG1
		PROC
		SYP
		SLC4A10
		PARP1
		CD14
		VDR
		HMGCR
		PPARD
		FH
		DSPP
		NR3C2
		PDPN
		GSR
		CACNA1C
		CACNA1D
		GGT1
		IVNS1ABP
		CD163
		DUSP19
		KDR
		SULT1E1
		IDO1
		GLUD1
		OPLAH
		ABCG2
		SLC1A6
		IL1RAPL2
		SLC12A7
		TUBA4A
		GFPT1
		ME2
		SLC27A6
		INS
		EPB41
		PFAS
		ALOX12
		RARA
		PML
		BGLAP
		MMP3
		LEO1
		TRAF6
		AXL
		PNPLA3
		PPARA
		CHRNA6
		KRIT1
		ASL
		CD59
		IL2RA
		TTR
		CACNB4
		NAMPT
		PTGER2
		UGT1A9
		VKORC1L1
		BACE1
		MMP8
		GLRA1
		RPS6
		SYCP2L
		ADCYAP1
		NTRK2
		CRH
		AGRN
		IL10
		CA4
		PLCB1
		PLCB4
		MAPK1
		MYRF
		IGF2
		CTSG
		SERPINA7
		CHRNA1
		GRIK1
		TXK
		GADD45A
		FPGS
		ADPRH
		AASS
		PRKG1
		RASGRP1
		AKAP1
		CYP27B1
		PSG2
		NAGLU
		SCG2
		STIM2
		CYP20A1
		RNASE3
		PADI4
		LPA
		TNFSF11
		NPC1L1
		SLC22A7
		GNAI1
		EGFR
		IKBKB
		CYP3A7
		FFAR4
		MYLK
		CYP4F2
		CD79A
		CAPN2
		FLT3
		TSPO
		ADORA1
		UCP1
		GRIK5
		DNPEP
		IL2
		TRIM52
		LYVE1
		APOH
		ERBB2
		CYP2C18
		PDX1
		CACNA1A
		FGA
		TLR7
		SLC1A1
		CEACAM5
		GGT7
		UGT1A7
		PSAT1
		CALU
		IFNG
		SLC4A9
		KCNA3
		SLC12A1
		CYP27A1
		IL4
		KYAT1
		PAFAH2
		DIABLO
		TSHZ3
		NAT2
		KCNN1
		CAD
		FADS3
		RPS12
		ENPEP
		SCT
		GABRD
		GLUL
		LIPG
		G6PD
		CTPS1
		TRPV4
		CD63
		EPHX1
		GABRP
		ADGRL3
		SULT1A3
		FEN1
		BCAT2
		ELOVL2
		F10
		CHRNB3
		ACVR1
		F2R
		THBS1
		BCL2L1
		ACSL1
		ADORA3
		RAB3IL1
		HELLS
		TXNRD1
		VIP
		ADK
		CACNA1S
		ABCD1
		AKR1B1
		CA2
		LTF
		TPO
		ETS1
		ASNS
		GATB
		GCKR
		NTF3
		CXCL1
		HRH1
		FAH
		HNF4A
		TNFRSF10B
		PLA2G7
		GABRR1
		TERT
		KRT18
		HIF1A
		RYR2
		PTS
		GGCX
		GLYAT
		DDC
		NOS3
		PTH
		TGFA
		TNFRSF11A
		RB1
		CFTR
		CETP
		PTPN6
		KCNA5
		ADSL
		ARMS2
		HSF1
		GRIK3
		CACNB2
		PDXDC1
		HBB
		CYB5R3
		ABCG5
		KNG1
		CASR
		CDK2
		CANT1
		GPAM
		TFAP2A
		CHRM2
		CCNH
		SLC12A5
		IL1RN
		GABRA4
		ODC1
		ADORA2B
		PPAT
		PTGES2
		SCN7A
		TLR4
		GABRB3
		CXCL10
		SDHC
		ITFG1
		AZIN2
		FECH
		IQCJ
		TACR3
		SERPINE1
		ADAMTS3
		GRM7
		CYP2C8
		GLS
		DNAH8
		STS
		SLC1A3
		DDHD1
		CCL5
		CSN1S1
		MAP1LC3A
		RSAD2
		GLRB
		SLC26A5
		LOX
		AKAP13
		FLG
		IFNA1
		ACP1
		HLA-DRB1
		AKR1C1
		DAGLA
		PEMT
		CDKN1A
		GPR32
		LPL
		ERAS
		LIPC
		CPOX
		JAK3
		JAK1
		FCER2
		CHRNA3
		F5
		MBP
		FABP4
		KCNB1
		GABRA5
		CFLAR
		PTPN3
		TMEM258
		ADM
		CLEC4G
		FABP12
		CD47
		PPIC
		CTPS2
		KCNC2
		TRPV3
		CYP2B6
		PRKAB1
		INHA
		HDAC1
		MUC5AC
		GRM4
		STX1B
		KLK1
		MIF
		MAP2K1
		KYAT3
		CHRNA9
		TIMP2
		QRSL1
		REN
		CHRM3
		RIMKLA
		KCND2
		AGXT
		ACOT4
		LCAT
		MBOAT7
		IL9
		IL11
		PRSS8
		KITLG
		TOP2B
		TXN
		GMPS
		ALB
		GPT2
		PTGS1
		GRIA4
		SREBF1
		SERPINC1
		F3
		CFP
		EPAS1
		NR1I2
		S100A12
		KCNJ5
		APOA1
		SCN10A
		KCNK5
		KRT12
		AKR1A1
		IFNB1
		FTCD
		PLP1
		TLR2
		BCAT1
		CDKN2A
		TPR
		DPAGT1
		ABCC8
		CEBPB
		GAS6
		GOT1L1
		TM6SF2
		CYP4F11
		ADAMTS5
		PTH1R
		FABP2
		PRSS53
		NXPH1
		PPARGC1B
		PGM3
		AR
		IVL
		HINT1
		CDKN3
		MPG
		SLC4A4
		ESR2
		ACOT8
		AGTR2
		GABRA3
		CYP2J2
		SLC22A10
		ADAMTSL1
		LACTB
		HSPG2
		EPO
		IL2RB
		APRT
		SLCO4C1
		NOTCH1
		AOX1
		FDPS
		IGHE
		CP
		SERPINA5
		SUOX
		CYP24A1
		NPAS3
		GATC
		PRKCA
		SLC16A1
		UGT1A3
		ALDH9A1
		AHSP
		SLC17A5
		HGF
		TYMP
		GGT5
		BAAT
		STX4
		TMEM37
		ACSL4
		ITGAL
		IL7
		SCN5A
		SCN9A
		PEPD
		SDHA
		GLS2
		CYP1B1
		GATA4
		VHL
		RPS6KA3
		INCENP
		SLC16A10
		FGF23
		CEACAM3
		LTA4H
		HBG1
		PNP
		CYP2R1
		CSF2
		S100A9
		LBR
		TOP1
		KCNA7
		OAT
		RNGTT
		MYB
		ADIPOQ
Possible target genes	36	IGF1
		PRL
		SQSTM1
		PENK
		MP2
		FAAH
		MTOR
		FABP3
		YWHAH
		ADRB1
		APAF1
		ITPR1
		NOX4
		GPX4
		TJP1
		ADRB2
		GSK3B
		SIGMAR1
		SLC2A1
		PRKN
		AKT2
		NR4A1
		CREB1
		SRD5A1
		HSPA5
		ABL1
		PIK3R2
		GSTO1
		PIK3R1
		P4HB
		POMC
		CYB5A
		GPX1
		NRG1
		BAX
		AKT3

## Sheet: astaxanthin
Names	total	elements
astaxanthin Possible target genes	16	SRD5A1
		NFKBIA
		COX5A
		MAPK14
		HMOX1
		PRKN
		NOS2
		MAPK8
		JUN
		CAT
		ABL1
		F2
		MMP1
		CYP3A4
		CXCL8
		SOD1
astaxanthin	44	CDK4
		PINK1
		DDR1
		SERPINC1
		AIFM1
		MARK2
		CDK6
		MMP13
		LOX
		F7
		MYC
		HTRA2
		LDLR
		TNFRSF8
		ALOX5
		SELP
		JAK1
		GJA1
		ITGA2B
		ZFP42
		RPS6KA5
		LYN
		PCSK9
		CCND2
		CYP2C19
		STAT3
		ALOX15
		CCL2
		PARL
		TNNT2
		PRKCD
		CD40LG
		XIAP
		CYP2B6
		SMAD3
		PTGS2
		POU5F1
		TRAP1
		BIRC5
		HAX1
		CCND1
		ODC1
		BIRC3
		LBR
Possible target genes	194	FAAH
		ACE
		GRIN2D
		DDIT3
		BDNF
		GPX4
		CD209
		PRKCE
		KCNMA1
		GRIN1
		MTOR
		GABBR1
		FOS
		SLC6A2
		CHRNA4
		BECN1
		HSPA5
		GABRA2
		CYP2A6
		SLC18A2
		ARRB2
		GRM1
		CXCR4
		GCLM
		BCL2
		SNCA
		IGF1
		TJP1
		VCAM1
		PLAU
		FABP3
		DRD3
		TP53
		FTH1
		CYB5A
		FGF2
		YWHAH
		ADRB1
		CCKBR
		MAP2K4
		CCK
		GRM3
		CGB5
		ADRB2
		SETD2
		TH
		TNF
		POR
		OPRD1
		VEGFA
		GPX1
		SLC6A4
		SOD2
		ADORA2A
		EGF
		GRIN2A
		KCNH2
		CASP9
		IL1A
		GRIN3B
		GHRL
		ICAM1
		ABAT
		RPS27A
		CAV1
		NTS
		DLD
		GRIA3
		SDHB
		DRD2
		HPRT1
		CNR2
		GRM2
		NGF
		HCRT
		PIK3R2
		MAPK3
		ABCC2
		RYR1
		SLC1A2
		PENK
		NRG1
		FMO1
		CASP8
		HRH3
		NLRP3
		MAPK10
		GABRG2
		MAOB
		GABRA6
		OXT
		ATP1A2
		CYP1A2
		GSTO1
		CYBB
		GAD1
		GDNF
		GAL
		CYP2D6
		KRAS
		GABRB2
		BRAF
		AKT1
		OPRK1
		GRIN2B
		PIK3R1
		GSTM1
		GRP
		ACHE
		BAX
		ANKK1
		GSK3B
		CHRNB2
		PPARG
		NOS1
		CHAT
		GUSB
		GRIN2C
		PRL
		TNFRSF1A
		DBH
		AKT3
		PDYN
		HSPA4
		GPT
		SIGMAR1
		DRD4
		ITIH4
		SQSTM1
		GSTT1
		TPH1
		CES1
		APAF1
		PNOC
		MTHFR
		PPIG
		MAP2
		MAPT
		GSTP1
		IL6
		CAMK2G
		ITPR1
		PDE4A
		ANXA5
		FMO3
		PIK3CG
		PLAT
		GABRA1
		APP
		GRIA2
		CPT2
		EGR1
		COMT
		CTNNB1
		SLC2A1
		AKT2
		TAT
		NFKB1
		SIRT1
		KCNQ1
		MB
		NQO1
		SLC6A3
		SRC
		IL1B
		NOX4
		PSMC6
		CNR1
		ABCB1
		NPY
		ALPP
		GAD2
		CHRNA2
		UCP2
		CASP3
		CHRNA7
		CYP2E1
		P4HB
		PIK3CA
		MAOA
		APOE
		SLC22A5
		GRIN3A
		MMP9
		NR4A1
		POMC
		PIK3C2A
		DRD1
		MP2
		TAC1
		ESR1
		CREB1
		OPRM1
		GFAP

## Sheet: Krill oil
Names	total	elements
Astaxanthin DHA EPA	12	NFKBIA
		COX5A
		MAPK14
		HMOX1
		NOS2
		MAPK8
		JUN
		CAT
		MMP1
		CYP3A4
		CXCL8
		SOD1
Astaxanthin DHA	2	SRD5A1
		ABL1
Astaxanthin EPA	1	F2
DHA EPA	70	ACE
		BDNF
		PRKCE
		KCNMA1
		FOS
		BECN1
		ARRB2
		SNCA
		BCL2
		VCAM1
		FTH1
		TP53
		FGF2
		CGB5
		TNF
		VEGFA
		SOD2
		GRIN2A
		EGF
		CASP9
		GHRL
		ICAM1
		CAV1
		HPRT1
		HCRT
		NGF
		MAPK3
		ABCC2
		SLC1A2
		CASP8
		NLRP3
		MAPK10
		OXT
		CYP1A2
		ATP1A2
		CYP2D6
		KRAS
		BRAF
		AKT1
		GRIN2B
		NOS1
		PPARG
		DBH
		TNFRSF1A
		GPT
		MTHFR
		PPIG
		MAPT
		CAMK2G
		IL6
		ANXA5
		PIK3CG
		PLAT
		APP
		CPT2
		EGR1
		CTNNB1
		NFKB1
		SIRT1
		NQO1
		SRC
		IL1B
		ABCB1
		ALPP
		UCP2
		CASP3
		CYP2E1
		APOE
		MMP9
		ESR1
Astaxanthin	1	PRKN
DHA	32	FAAH
		GPX4
		MTOR
		HSPA5
		IGF1
		TJP1
		FABP3
		CYB5A
		YWHAH
		ADRB1
		ADRB2
		GPX1
		PIK3R2
		PENK
		NRG1
		GSTO1
		PIK3R1
		BAX
		GSK3B
		PRL
		AKT3
		SIGMAR1
		SQSTM1
		APAF1
		ITPR1
		SLC2A1
		AKT2
		NOX4
		P4HB
		NR4A1
		POMC
		CREB1
EPA	91	GRIN2D
		DDIT3
		CD209
		GRIN1
		GABBR1
		SLC6A2
		CHRNA4
		GABRA2
		CYP2A6
		SLC18A2
		GRM1
		CXCR4
		GCLM
		PLAU
		DRD3
		CCKBR
		MAP2K4
		GRM3
		CCK
		SETD2
		TH
		OPRD1
		POR
		SLC6A4
		ADORA2A
		KCNH2
		IL1A
		GRIN3B
		ABAT
		RPS27A
		NTS
		DLD
		GRIA3
		SDHB
		DRD2
		CNR2
		GRM2
		RYR1
		FMO1
		HRH3
		GABRG2
		MAOB
		GABRA6
		CYBB
		GAD1
		GDNF
		GAL
		GABRB2
		OPRK1
		GRP
		GSTM1
		ACHE
		ANKK1
		CHRNB2
		GUSB
		CHAT
		GRIN2C
		PDYN
		HSPA4
		DRD4
		ITIH4
		GSTT1
		TPH1
		CES1
		PNOC
		MAP2
		GSTP1
		PDE4A
		FMO3
		GABRA1
		GRIA2
		COMT
		TAT
		KCNQ1
		MB
		SLC6A3
		PSMC6
		CNR1
		NPY
		GAD2
		CHRNA2
		CHRNA7
		PIK3CA
		MAOA
		SLC22A5
		GRIN3A
		PIK3C2A
		DRD1
		TAC1
		OPRM1
		GFAP
